# Supplementary material
Source: PubMed Central journal article supplement (PMC4874339)

# Supplementary Figure 1

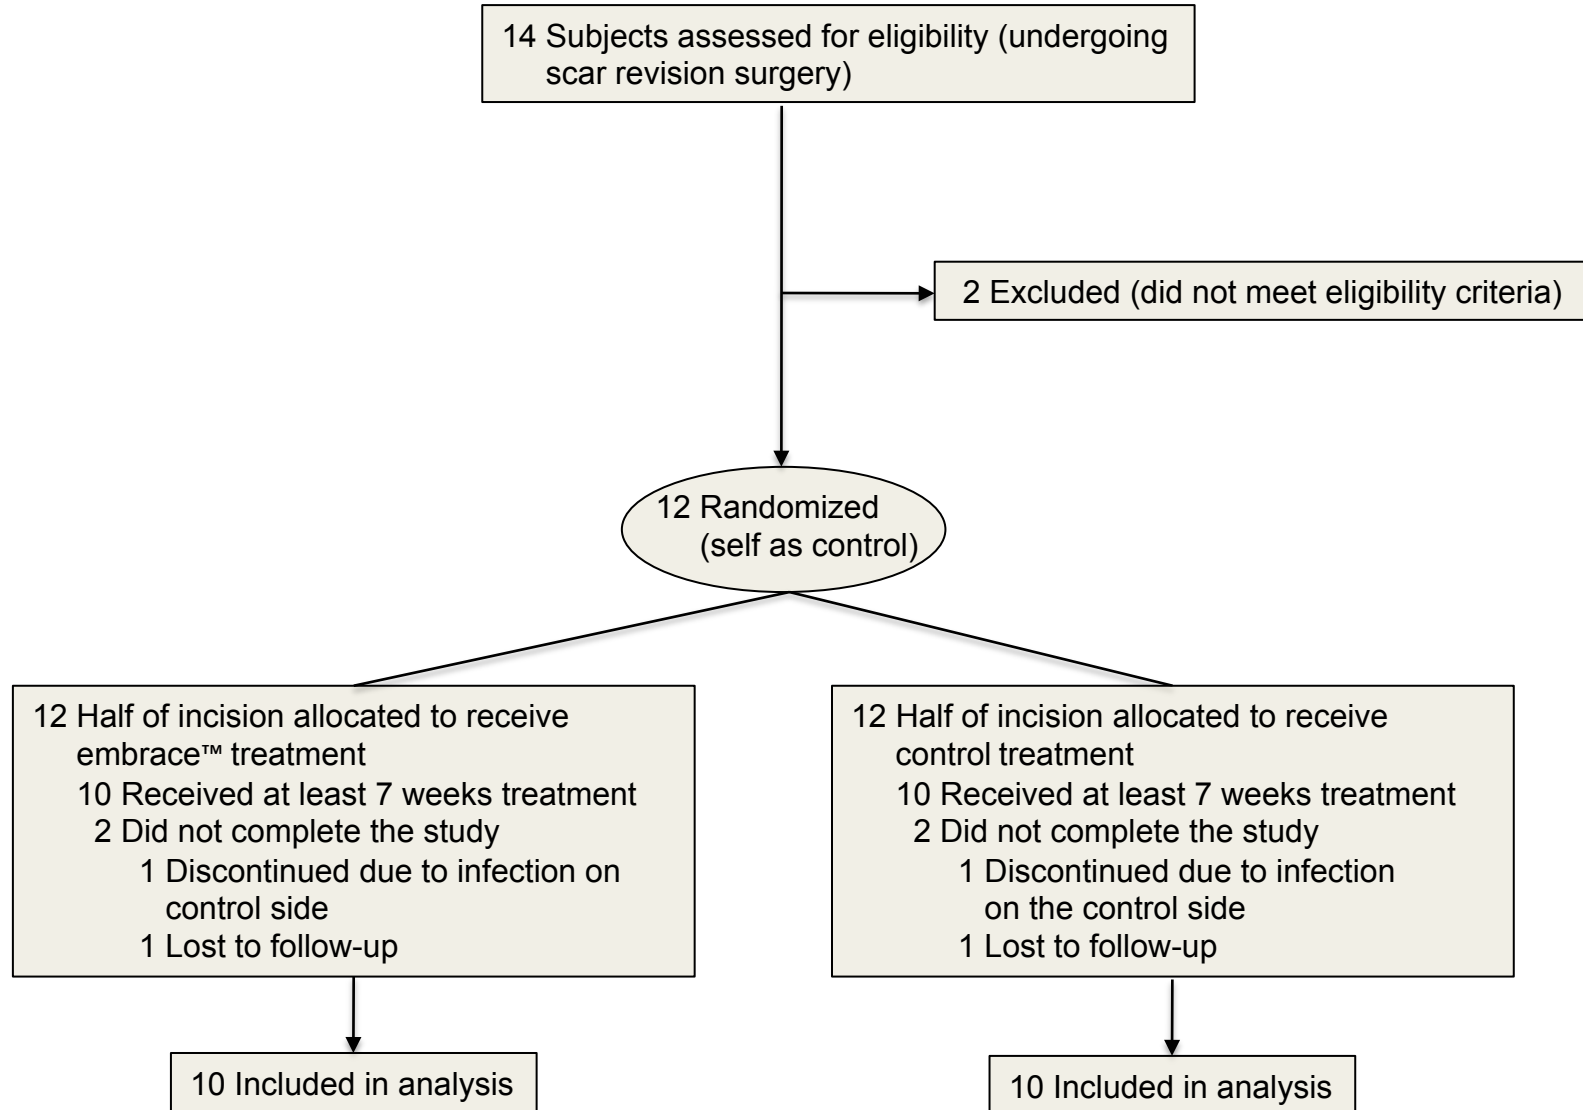

Supplement: NIHMS775724-supplement-Supplementary_Figure_1.pdf [file NIHMS775724-supplement-Supplementary_Figure_1.pdf]
